# Supplementary material for: Origin and remedy for HSQC artifacts in proton-detected INADEQUATE spectra
Source: Royal Society of Chemistry journal article supplement (doi:10.1039/d3cp00142c), 2023-01-01
Supplement: d3cp00142c1.pdf [file d3cp00142c1.pdf]

## SUPPORTING INFORMATION

|                    |                                                                    |         |
|--------------------|--------------------------------------------------------------------|---------|
| <b>Section S1.</b> | Product operator analysis of the PDI-1 pulse sequence in Fig. 1a.  | Page 2  |
| <b>Figure S1.</b>  | Separate outline of the three pulse sequences in Figure 1A-C.      | Page 4  |
| <b>Figure S2.</b>  | F <sub>2</sub> sections through HSQC artifacts in Figure 3.        | Page 5  |
| <b>Figure S3.</b>  | Additional F <sub>2</sub> sections from data shown in Figure 3 A-C | Page 6  |
| <b>Section S2.</b> | Pulse program for PDI experiment described in Figure 1B.           | Page 7  |
| <b>Section S3.</b> | Pulse program for PDI experiment described in Figure 1C.           | Page 12 |

## Section S1. Product operator analysis of the PDI-1 pulse sequence in Fig. 1a

- The analysis is for the antiecho part in a  $^{13}\text{CH}-^{13}\text{CH}$  spin system with  $I$  and  $S$  representing  $^1\text{H}$  and  $^{13}\text{C}$  spins, respectively.
- Irrelevant terms are dropped along the way in the analysis, particularly those leading to transverse  $S$ -spin operators after the central pair of  $(\pi/2)_y(\text{H})$  and  $(\pi/2)_{-y}(\text{C})$  pulses. Terms in red are dropped in the succeeding step of the analysis.
- The delays  $\tau$  and  $2d$  are tuned exactly to  $0.5/J_{\text{CH}}$
- The two sets of simultaneous refocusing pulses of the back-transfer sequence are respectively condensed into the preceding pair of  $(\pi/2)_x(\text{H,C})$  and the final  $(\pi/2)_x(\text{H})$  pulse.
- The normalization and scaling of the individual density operators are chosen for convenience and is not consistent.
- The terms in black are modulated by the chemical shift frequency of spin  $S_2$  whilst the blue ones are modulated by chemical shift frequency of spin  $S_1$ .
- For symmetry reasons it suffices to analyze magnetization originating from one of the protons.

**Right before the  $2\pi/3$  pulse:**

$$\sigma_1: 4I_{1z}S_1^+S_2^+$$

**Right after the  $2\pi/3$  pulse and including the effect of the succeeding  $^{13}\text{C}$   $\pi$  pulse:**

$$\sigma_2: 4I_{1z}S_1^+S_{2z} + 4I_{1z}S_{1z}S_2^+ = 4I_{1z}S_{1x}S_{2z} + i4I_{1z}S_{1y}S_{2z} + 4I_{1z}S_{1z}S_{2x} + i4I_{1z}S_{1z}S_{2y}$$

**At the end of the  $\tau_C$  delay:**

$$\sigma_3: [4I_{1z}S_{1x}S_{2z} + i4I_{1z}S_{1y}S_{2z}] \cos(\pi J_{CC}\tau_C) + [2I_{1z}S_{1y} - i2I_{1z}S_{1x}] \sin(\pi J_{CC}\tau_C) + \\ [4I_{1z}S_{1z}S_{2x} + i4I_{1z}S_{1z}S_{2y}] \cos(\pi J_{CC}\tau_C) + [2I_{1z}S_{2y} - i2I_{1z}S_{2x}] \sin(\pi J_{CC}\tau_C)$$

**Right after  $(\pi/2)_{-x}(\text{H,C})$ :**

$$\sigma_4: [4I_{1y}S_{1x}S_{2y} - i4I_{1y}S_{1z}S_{2y}] \cos(\pi J_{CC}\tau_C) + [-2I_{1y}S_{1z} - i2I_{1y}S_{1x}] \sin(\pi J_{CC}\tau_C) + \\ [4I_{1y}S_{1y}S_{2x} - i4I_{1y}S_{1y}S_{2z}] \cos(\pi J_{CC}\tau_C) + [-2I_{1y}S_{2z} - i2I_{1y}S_{2x}] \sin(\pi J_{CC}\tau_C)$$

**At the end of the  $2d$  delay:**

$$\sigma_5: [-8I_{1y}S_{1x}S_{2x}I_{2z} - i4I_{1x}S_{2x}I_{2z} \cos(\pi J_{CC}2d)] \cos(\pi J_{CC}\tau_C) + [I_{1x} - i2I_{1y}S_{1x} \cos(\pi J_{CC}2d)] \sin(\pi J_{CC}\tau_C) + \\ [8I_{1y}S_{1y}S_{2y}I_{2z} + i2I_{1y}S_{1x} \sin(\pi J_{CC}2d)] \cos(\pi J_{CC}\tau_C) + [4I_{1x}S_{1z}S_{2z} - i4I_{1x}S_{2x}I_{2z} \sin(\pi J_{CC}2d)] \sin(\pi J_{CC}\tau_C)$$

**Right after  $(\pi/2)_y(\text{H})$  and  $(\pi/2)_{-y}(\text{C})$ :**

$$\sigma_6: [-8I_{1y}S_{1z}S_{2z}I_{2x} + i4I_{1z}S_{2z}I_{2x} \cos(\pi J_{CC}2d)] \cos(\pi J_{CC}\tau_C) + [-I_{1z} - i2I_{1y}S_{1z} \cos(\pi J_{CC}2d)] \sin(\pi J_{CC}\tau_C) + \\ i2I_{1y}S_{1z} \sin(\pi J_{CC}2d) \cos(\pi J_{CC}\tau_C) + i4I_{1z}S_{2z}I_{2x} \sin(\pi J_{CC}2d) \sin(\pi J_{CC}\tau_C)$$

**At the end of the  $\tau$  delay:**

$$\sigma_7: [2I_{1x}I_{2y} + i2I_{1z}I_{2y} \cos(\pi J_{CC}2d)] \cos(\pi J_{CC}\tau_C) + [-I_{1z} + iI_{1x} \cos(\pi J_{CC}2d)] \sin(\pi J_{CC}\tau_C)$$

$$-iI_{1x}\sin(\pi J_{CC}2d)\cos(\pi J_{CC}\tau_C) + i2I_{1z}I_{2y}\sin(\pi J_{CC}2d)\sin(\pi J_{CC}\tau_C)$$

**Right after  $(\pi/2)_x(\mathbf{H})$  and including the effect of the final  $^1\text{H}$   $\pi$  pulse:**

$$\sigma_8: [2I_{1x}I_{2z} - i2I_{1y}I_{2z}\cos(\pi J_{CC}2d)]\cos(\pi J_{CC}\tau_C) + [I_{1y} + iI_{1x}\cos(\pi J_{CC}2d)]\sin(\pi J_{CC}\tau_C) \\ - iI_{1x}\sin(\pi J_{CC}2d)\cos(\pi J_{CC}\tau_C) - i2I_{1y}I_{2z}\sin(\pi J_{CC}2d)\sin(\pi J_{CC}\tau_C)$$

**Back to raising and lowering operators and keeping only the latter:**

$$\sigma_8: \frac{1}{2}2I_1^-I_{2z}(1 + \cos(\pi J_{CC}2d))\cos(\pi J_{CC}\tau_C) + \frac{i}{2}\{I_1^- \sin(\pi J_{CC}\tau_C)(1 + \cos(\pi J_{CC}2d))\} \\ - \frac{i}{2}I_1^- \sin(\pi J_{CC}2d)\cos(\pi J_{CC}\tau_C) + \frac{1}{2}2I_1^-I_{2z}\sin(\pi J_{CC}2d)\sin(\pi J_{CC}\tau_C)$$

**In summary:**

$$\text{PDI peaks: } \left\{ \frac{i}{2}I_1^- \sin(\pi J_{CC}\tau_C) + \frac{1}{2}2I_1^-I_{2z}\cos(\pi J_{CC}\tau_C) \right\} (1 + \cos(\pi J_{CC}2d))$$

$$\text{HSQC peaks: } \left\{ -\frac{i}{2}I_1^- \cos(\pi J_{CC}\tau_C) + \frac{1}{2}2I_1^-I_{2z}\sin(\pi J_{CC}\tau_C) \right\} \sin(\pi J_{CC}2d)$$

or split up on the two doublet components:

$$\text{PDI peaks: } \left\{ I_1^- I_2^\alpha e^{i\pi J_{CC}\tau_C} - I_1^- I_2^\beta e^{-i\pi J_{CC}\tau_C} \right\} (1 + \cos(\pi J_{CC}2d))$$

$$\text{HSQC peaks: } -i \left\{ I_1^- I_2^\alpha e^{i\pi J_{CC}\tau_C} + I_1^- I_2^\beta e^{-i\pi J_{CC}\tau_C} \right\} \sin(\pi J_{CC}2d)$$

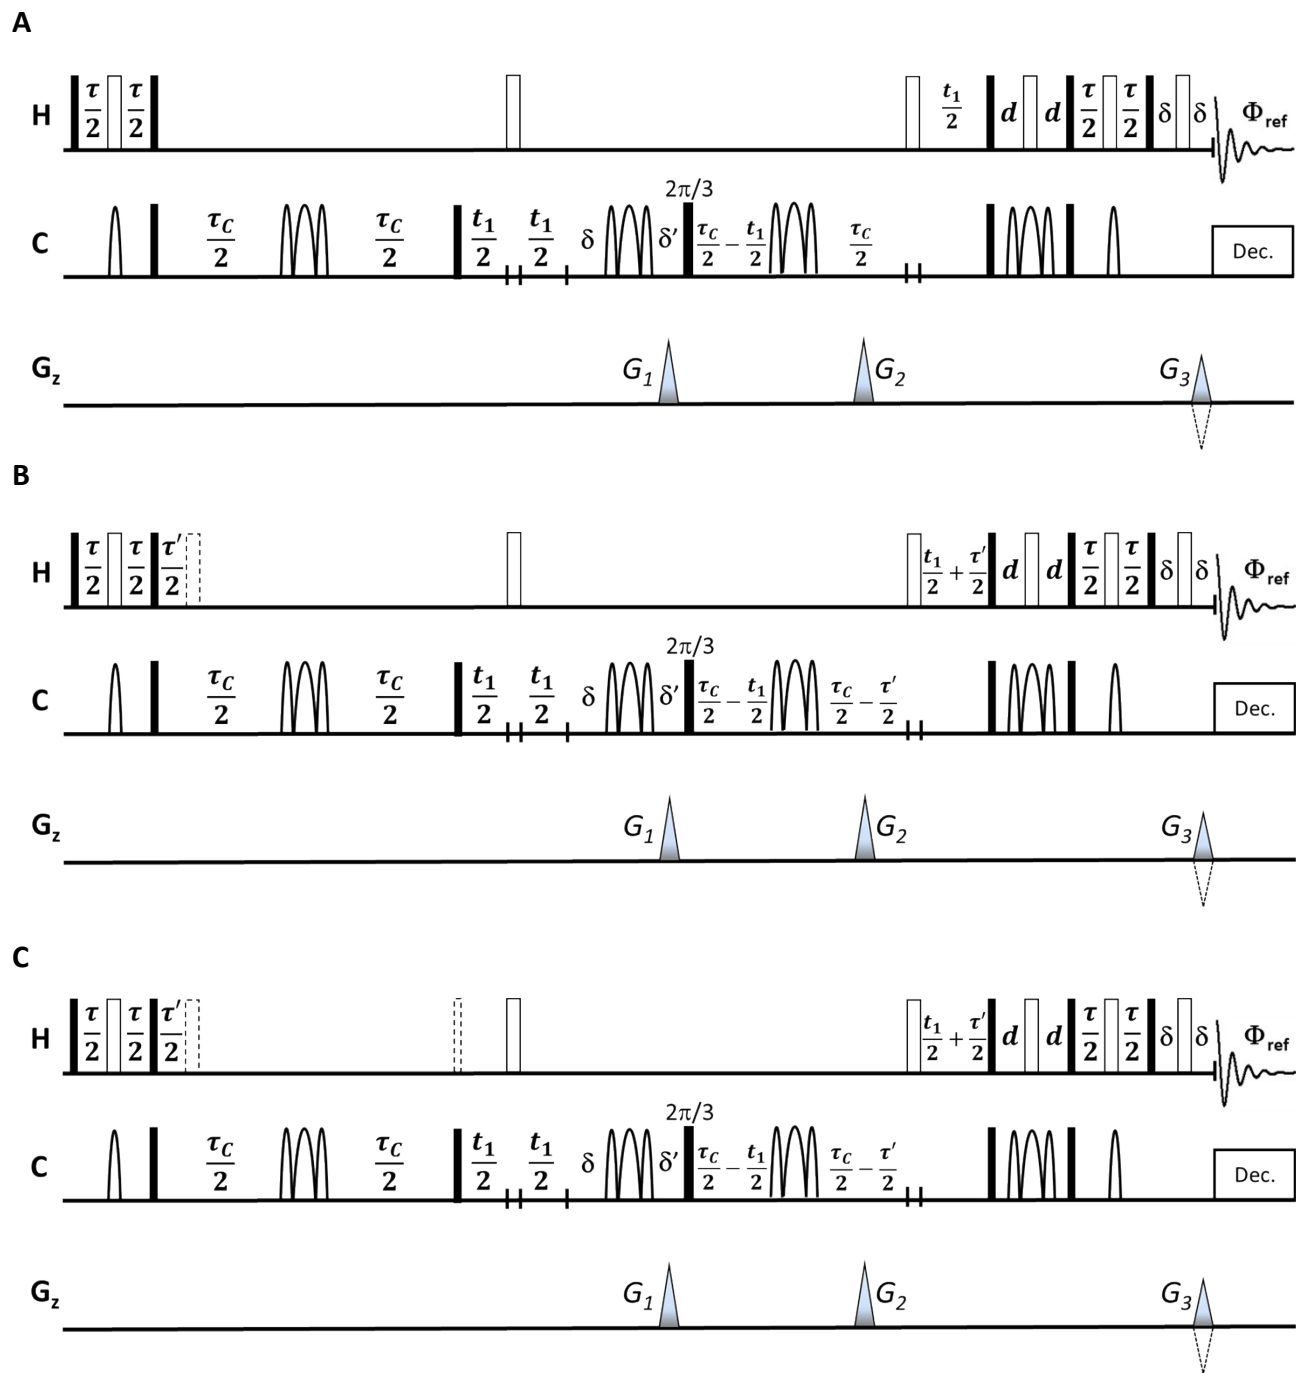

**Figure S1.** The three PDI-1 SQ NMR pulse sequences in Fig. 1 outlined separately. **A.** The one described by Reif et al. **B.** Refocused version. **C.** Refocused version with a  $^1\text{H}$  purging pulse prior to  $t_1$ . Further details are in the Fig. 1 caption.

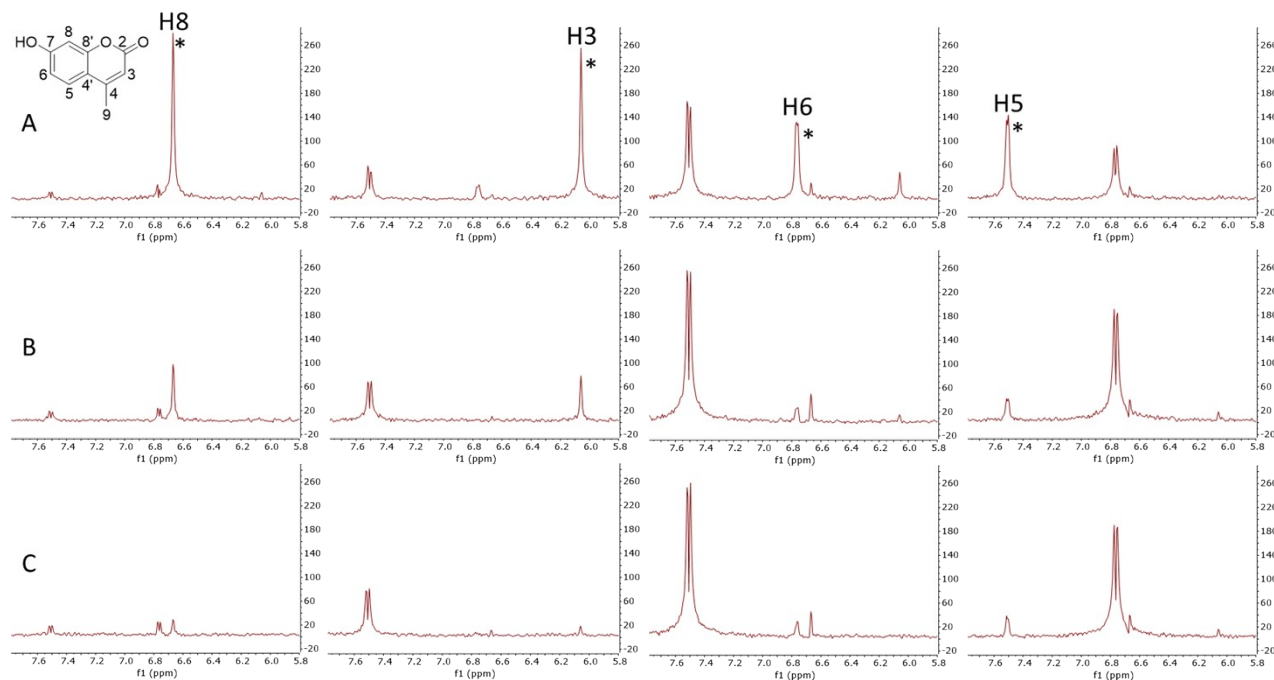

**Figure S2.** F<sub>2</sub> sections through HSQC artifacts (\*) designated in Figure 1 by shaded circles illustrating progressive suppression of these artifacts by the A-C versions of PDI-1 SQ in Fig.1 or Fig. S1 A-C. Data are shown in absolute value mode.

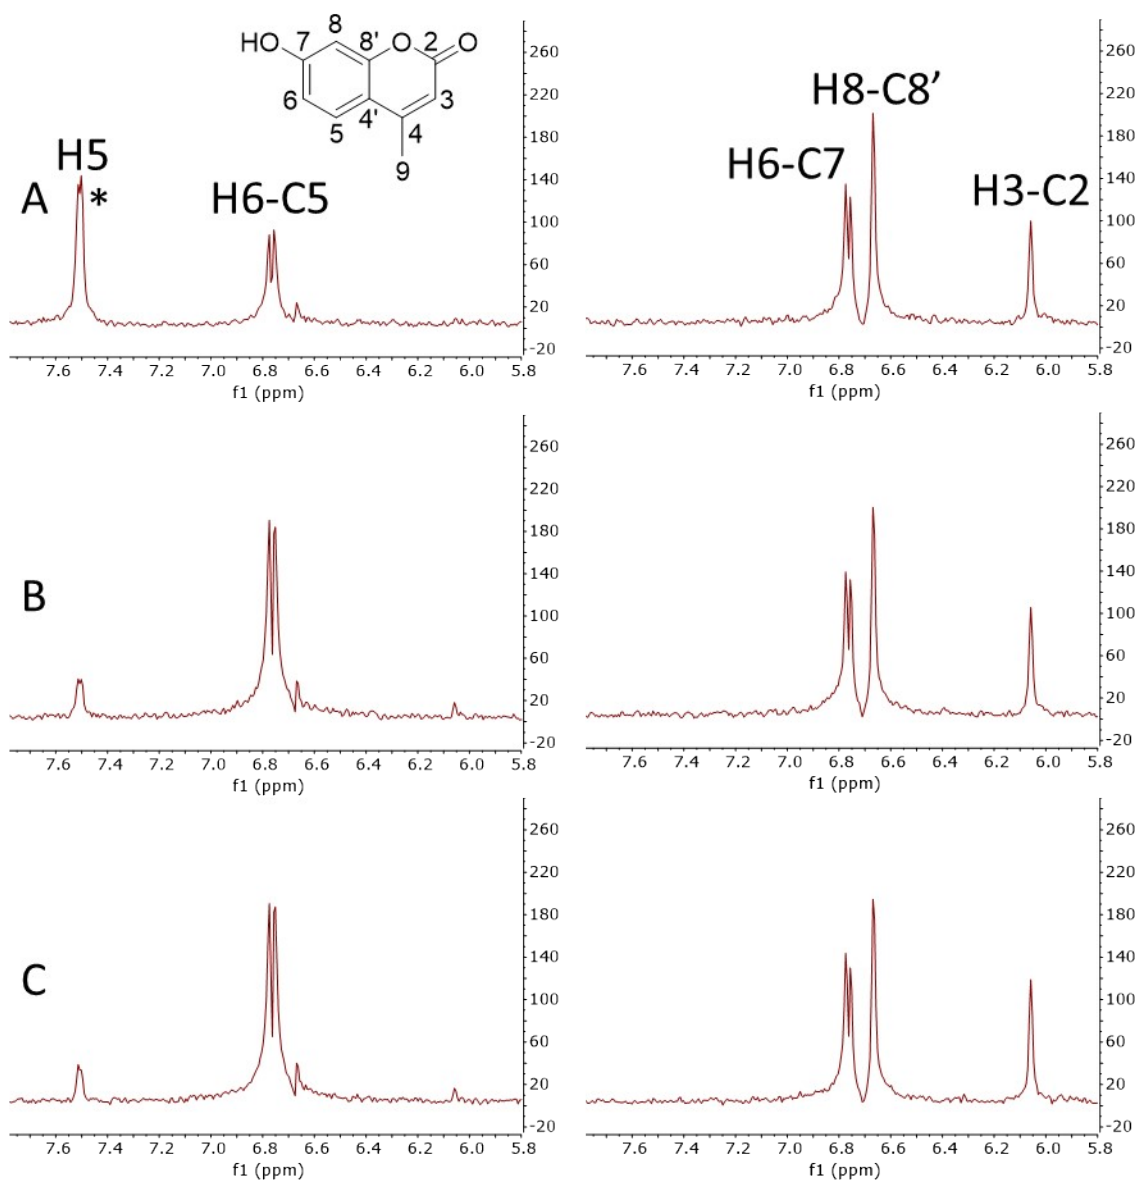

**Figure S3.**  $F_2$  sections taken at the positions of the dashed lines in Figure 1 A-C illustrating about 2x sensitivity gain for the methine-methine H6-C5 PDI correlation in B and C and the about equal sensitivity for H6-C7, H8-C8', and H3-C2 methine-quaternary correlations. The \* indicates the H5-C5 HSQC artifact. Data are shown in absolute-value mode.

**Section S2.** Pulse program for PDI experiment described in Figure 1B.

```
;adeq_PDI_1.tw
;avance-version (15/02/27)
; 2D-HSQC-1J(CC)-ADEQUATE
; with refocussing of C chemical shift
; using sensitivity improvement
;phase sensitive using Echo/Antiecho gradient selection
;with decoupling during acquisition
;using shaped pulses for 180degree pulses on f2 - channel
;
;B. Reif, M. Koeck, R. Kerssebaum, H. Kang, W. Fenical & C. Griesinger
; J. Magn. Reson. A118, 282-285 (1996).
;M. Koeck, R. Kerssebaum & W. Bermel, Magn. Reson. Chem. 41, 65-69 (2003)
;
;$CLASS=HighRes
;$DIM=2D
;$TYPE=
;$SUBTYPE=
;$COMMENT=
```

```
#include <Avance.incl>
#include <Delay.incl>
#include <Grad.incl>
```

```
"p2=p1*2"
"d0=3u"
"d11=30m"
```

```
"p0=p3*1.333"
"d4=1s/(cnst2*4)"
"d23=1s/(cnst3*4)"
"d24=1s/(cnst2*cnst11)"
```

```
"in0=inf1/2"
```

```
"in20=in0"
```

```
"d20=d23-4u"
```

```
"td1=tdmax(td1,d20*2,in20)"
```

"DELTA1=p16+d16-p2-d0\*2+4u"  
 "DELTA2=p16+d16+6u"  
 "DELTA3=d23-d4-p16-d16-4u-p2-d0"  
 "DELTA4=d4-p14/2-4u"  
 "DELTA5=d23-p24/2-4u"  
 "DELTA6=d24-cnst17\*p24/2-4u"  
 "DELTA7=d4-4u"  
 "DELTA8=d23-d4-p2-p24/2-4u"

1 ze  
 d11 pl12:f2  
 2 d1 do:f2  
 3 (p1 ph1)  
 4u  
 DELTA4 pl0:f2  
 (center (p2 ph1) (p14:sp3 ph1):f2 )  
 4u  
 DELTA4 pl2:f2  
 (p1 ph2) (p3 ph4):f2  
 4u  
 DELTA7 pl2:f2  
 (p2 ph1)  
 4u  
 DELTA8 pl0:f2  
 (p24:sp7 ph8):f2  
 4u  
 DELTA5 pl2:f2  
 (p3 ph9):f2  
 d0  
 (p2 ph1)  
 d0  
 DELTA1 pl0:f2 UNBLKGRAD  
 (p24:sp7 ph11):f2  
 4u  
 p16:gp1  
 d16 pl2:f2  
 (p0 ph10):f2  
 4u  
 d20 pl0:f2  
 (p24:sp7 ph11):f2  
 4u



```

p16:gp2
d16
DELTA3 pl2:f2
(p2 ph1)
d0
d4
(center (p1 ph1) (p3 ph5):f2 )
4u
DELTA6 pl0:f2
(center (p2 ph1) (p24:sp7 ph1):f2 )
4u
DELTA6 pl2:f2
(center (p1 ph2) (p3 ph6):f2 )
4u
DELTA4 pl0:f2
(center (p2 ph1) (p14:sp3 ph1):f2 )
4u
DELTA4
(p1 ph1)
DELTA2
(p2 ph1)
3u
p16:gp3*EA
d16 pl12:f2
3u BLKGRAD
go=2 ph31 cpd2:f2
d1 do:f2 mc #0 to 2 F1EA(calgrad(EA) & calph(ph6, +180), caldel(d0, +in0) & caldel(d20, -in20))
exit

```

```

ph1=0
ph2=1
ph4=0 2
ph5=0 0 2 2
ph6=1 1 3 3
ph7=0
ph8=0
ph9=1 1 1 1 3 3 3 3
ph10=1 1 1 1 1 1 1 1 3 3 3 3 3 3 3 3
ph11=0
ph31=0 2 2 0 2 0 2 0 2 2 0 2 0 2 2 0

```

```

;pl0 : 0W

```

```

;pl1 : f1 channel - power level for pulse (default)
;pl2 : f2 channel - power level for pulse (default)
;pl12: f2 channel - power level for CPD/BB decoupling
;sp3: f2 channel - shaped pulse (180degree inversion)
;spnam3: Crp60,0.5,20.1
;sp7: f2 channel - shaped pulse (180degree refocussing)
;spnam7: Crp60comp.4
;p0 : f2 channel - 120 degree high power pulse
;p1 : f1 channel - 90 degree high power pulse
;p2 : f1 channel - 180 degree high power pulse
;p3 : f2 channel - 90 degree high power pulse
;p14: f2 channel - 180 degree shaped pulse for inversion
;   = 500usec for Crp60,0.5,20.1
;p16: homospoil/gradient pulse
;p24: f2 channel - 180 degree shaped pulse for refocussing
;   = 2msec for Crp60comp.4
;d0 : incremented delay (2D)           [3 usec]
;d1 : relaxation delay; 1-5 * T1
;d4 : 1/4J(CH)
;d11: delay for disk I/O               [30 msec]
;d16: delay for homospoil/gradient recovery
;d20: d23 - 4u
;d23: 1/(4J(CC))
;d24: 1/(4J(CH)) for CH
;   1/(8J(CH)) for all multiplicities
;cnst2 : J(CH) = 127 .. 160 Hz
;cnst3 : J(CC) = 35 .. 55 Hz
;cnst11: for multiplicity selection = 4 for CH, 8 for CHn
;cnst17: = -0.5 for Crp60comp.4
;inf1: 1/SW(C) = 2 * DW(C)
;in0: 1/(2 * SW(C)) = DW(C)
;nd0: 2
;in20: = in0
;ns: 16 * n
;ds: >= 16
;td1: number of experiments
;FnMODE: echo-antiecho
;cpd2: decoupling according to sequence defined by cpdprg2
;pcpd2: f2 channel - 90 degree pulse for decoupling sequence

;for z-only gradients:
;gpz1: +78.5%
;gpz2: +77.6%

```

;gpz3: -59%

;use gradient files:

;gpnam1: SMSQ10.100

;gpnam2: SMSQ10.100

;gpnam3: SMSQ10.100

;cnst17: Factor to compensate for coupling evolution during a pulse

; (usually +1). A positive factor indicates that coupling

; evolution continues during the pulse, whereas a negative

; factor is necessary if the coupling is (partially) refocussed.

;\$ld: adeq11etgprdsp,v 1.11.2.2 2015/03/03 11:21:17 ber Exp \$

**Section S3.** Pulse program for PDI experiment described in Figure 1C.

```
;adeq_PDI_2.tw
;avance-version (15/02/27)
; 2D-HSQC-1J(CC)-ADEQUATE
; with refocussing of C chemical shift
; using sensitivity improvement
;phase sensitive using Echo/Antiecho gradient selection
;with decoupling during acquisition
;using shaped pulses for 180degree pulses on f2 - channel
;
;B. Reif, M. Koeck, R. Kerssebaum, H. Kang, W. Fenical & C. Griesinger
; J. Magn. Reson. A118, 282-285 (1996).
;M. Koeck, R. Kerssebaum & W. Bermel, Magn. Reson. Chem. 41, 65-69 (2003)
;
;$CLASS=HighRes
;$DIM=2D
;$TYPE=
;$SUBTYPE=
;$COMMENT=
```

```
#include <Avance.incl>
#include <Delay.incl>
#include <Grad.incl>
```

```
"p2=p1*2"
"d0=3u"
"d11=30m"
```

```
"p0=p3*1.333"
"d4=1s/(cnst2*4)"
"d23=1s/(cnst3*4)"
"d24=1s/(cnst2*cnst11)"
```

```
"in0=inf1/2"
```

```
"in20=in0"
```

```
"d20=d23-4u"
```

```
"td1=tdmax(td1,d20*2,in20)"
```

"DELTA1=p16+d16-p2-d0\*2+4u"  
"DELTA2=p16+d16+6u"  
"DELTA3=d23-d4-p16-d16-4u-p2-d0"  
"DELTA4=d4-p14/2-4u"  
"DELTA5=d23-p24/2-4u"  
"DELTA6=d24-cnst17\*p24/2-4u"  
"DELTA7=d4-4u"  
"DELTA8=d23-d4-p2-p24/2-4u"

1 ze  
d11 pl12:f2  
2 d1 do:f2  
3 (p1 ph1)  
4u  
DELTA4 pl0:f2  
(center (p2 ph1) (p14:sp3 ph1):f2 )  
4u  
DELTA4 pl2:f2  
(p1 ph2) (p3 ph4):f2  
4u  
DELTA7 pl2:f2  
(p2 ph1)  
4u  
DELTA8 pl0:f2  
(p24:sp7 ph8):f2  
4u  
DELTA5 pl2:f2  
(p1 ph1)(p3 ph9):f2  
d0  
(p2 ph1)  
d0  
DELTA1 pl0:f2 UNBLKGRAD  
(p24:sp7 ph11):f2  
4u  
p16:gp1  
d16 pl2:f2  
(p0 ph10):f2  
4u  
d20 pl0:f2  
(p24:sp7 ph11):f2  
4u

```

p16:gp2
d16
DELTA3 pl2:f2
(p2 ph1)
d0
d4
(center (p1 ph1) (p3 ph5):f2 )
4u
DELTA6 pl0:f2
(center (p2 ph1) (p24:sp7 ph1):f2 )
4u
DELTA6 pl2:f2
(center (p1 ph2) (p3 ph6):f2 )
4u
DELTA4 pl0:f2
(center (p2 ph1) (p14:sp3 ph1):f2 )
4u
DELTA4
(p1 ph1)
DELTA2
(p2 ph1)
3u
p16:gp3*EA
d16 pl12:f2
3u BLKGRAD
go=2 ph31 cpd2:f2
d1 do:f2 mc #0 to 2 F1EA(calgrad(EA) & calph(ph6, +180), caldel(d0, +in0) & caldel(d20, -in20))
exit

```

```

ph1=0
ph2=1
ph4=0 2
ph5=0 0 2 2
ph6=1 1 3 3
ph7=0
ph8=0
ph9=1 1 1 1 3 3 3 3
ph10=1 1 1 1 1 1 1 1 3 3 3 3 3 3 3 3
ph11=0
ph31=0 2 2 0 2 0 2 0 2 2 0 0 2 0 2 2 0

```

```

;pl0 : 0W

```

```

;pl1 : f1 channel - power level for pulse (default)
;pl2 : f2 channel - power level for pulse (default)
;pl12: f2 channel - power level for CPD/BB decoupling
;sp3: f2 channel - shaped pulse (180degree inversion)
;spnam3: Crp60,0.5,20.1
;sp7: f2 channel - shaped pulse (180degree refocussing)
;spnam7: Crp60comp.4
;p0 : f2 channel - 120 degree high power pulse
;p1 : f1 channel - 90 degree high power pulse
;p2 : f1 channel - 180 degree high power pulse
;p3 : f2 channel - 90 degree high power pulse
;p14: f2 channel - 180 degree shaped pulse for inversion
;   = 500usec for Crp60,0.5,20.1
;p16: homospoil/gradient pulse
;p24: f2 channel - 180 degree shaped pulse for refocussing
;   = 2msec for Crp60comp.4
;d0 : incremented delay (2D)           [3 usec]
;d1 : relaxation delay; 1-5 * T1
;d4 : 1/4J(CH)
;d11: delay for disk I/O               [30 msec]
;d16: delay for homospoil/gradient recovery
;d20: d23 - 4u
;d23: 1/(4J(CC))
;d24: 1/(4J(CH)) for CH
;   1/(8J(CH)) for all multiplicities
;cnst2 : J(CH) = 127 .. 160 Hz
;cnst3 : J(CC) = 35 .. 55 Hz
;cnst11: for multiplicity selection = 4 for CH, 8 for CHn
;cnst17: = -0.5 for Crp60comp.4
;inf1: 1/SW(C) = 2 * DW(C)
;in0: 1/(2 * SW(C)) = DW(C)
;nd0: 2
;in20: = in0
;ns: 16 * n
;ds: >= 16
;td1: number of experiments
;FnMODE: echo-antiecho
;cpd2: decoupling according to sequence defined by cpdprg2
;pcpd2: f2 channel - 90 degree pulse for decoupling sequence

;for z-only gradients:
;gpz1: +78.5%
;gpz2: +77.6%

```

;gpz3: -59%

;use gradient files:

;gpnam1: SMSQ10.100

;gpnam2: SMSQ10.100

;gpnam3: SMSQ10.100

;cnst17: Factor to compensate for coupling evolution during a pulse

; (usually +1). A positive factor indicates that coupling

; evolution continues during the pulse, whereas a negative

; factor is necessary if the coupling is (partially) refocussed.

;\$ld: adeq11etgprdsp,v 1.11.2.2 2015/03/03 11:21:17 ber Exp \$
